# Supplementary material
Source: PubMed Central journal article supplement (PMC7606368)
Supplement: NIHMS1587910-supplement-2.pdf [file NIHMS1587910-supplement-2.pdf]

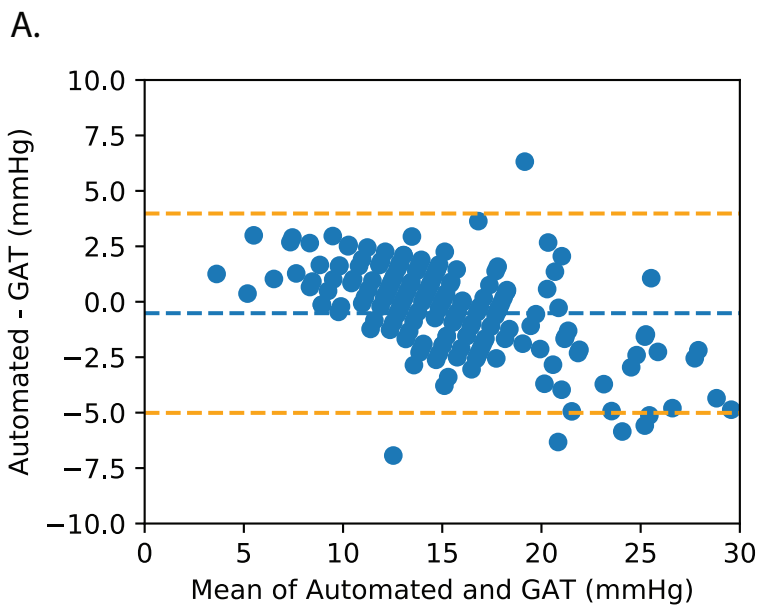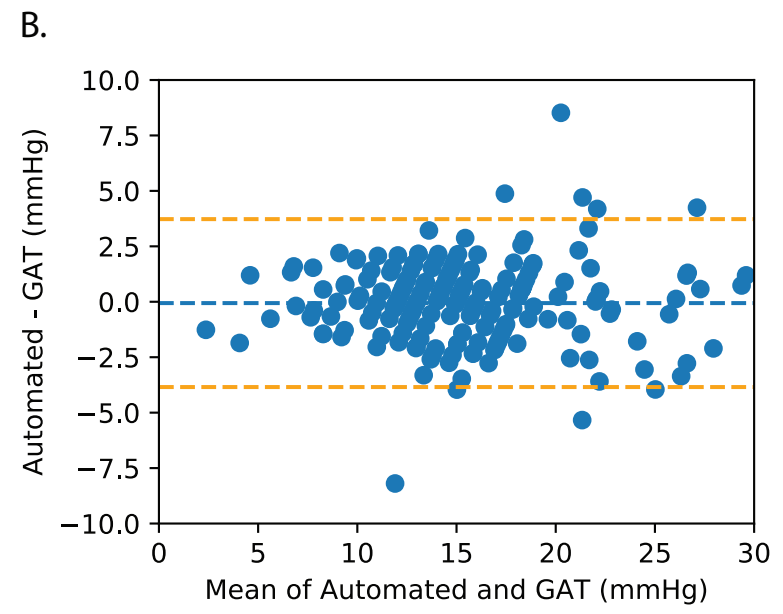

**Supplemental Figure 2. Bland-Altman plots of training data.** The intraocular pressure (IOP) values from standard versus automated Goldmann applanation tonometry (GAT) for training videos were compared before (A) and after (B) adjustment for proportional bias.
