# Supplementary material
Source: PubMed Central journal article supplement (PMC7606368)
Supplement: NIHMS1587910-supplement-3.pdf [file NIHMS1587910-supplement-3.pdf]

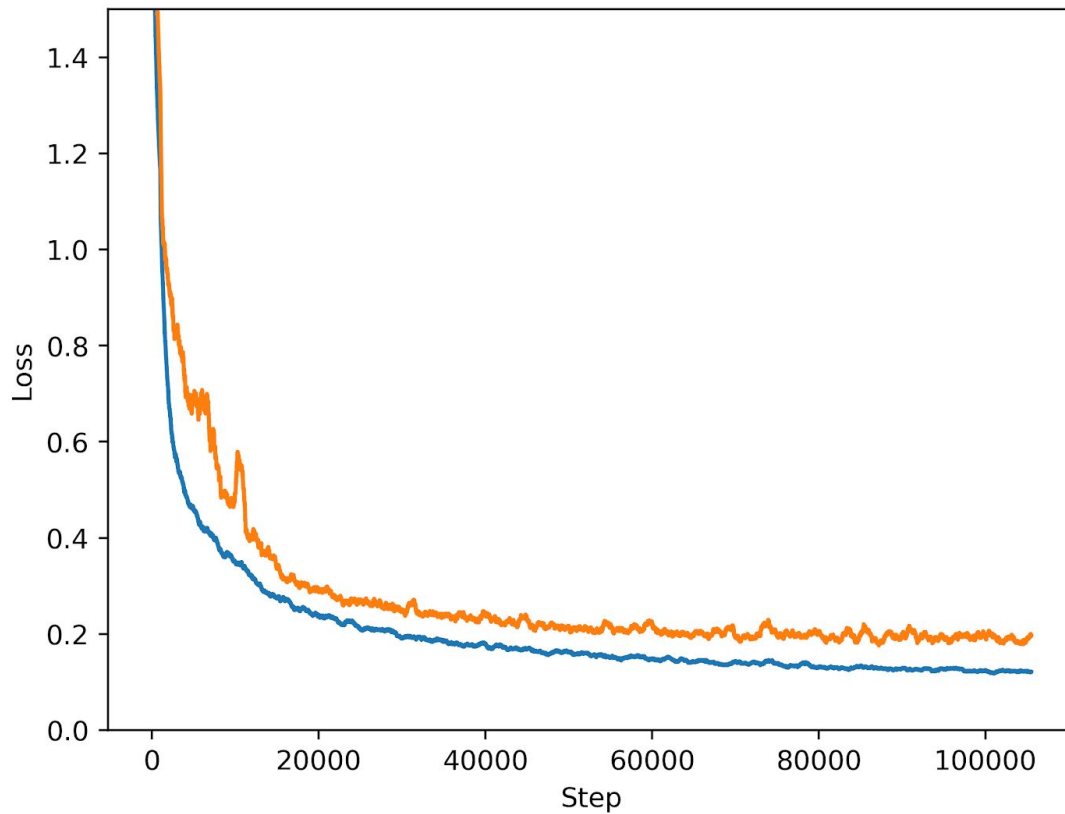

**Supplemental Figure 3. Learning curves for deep learning model.** The summed combined loss for binary cross entropy classification and 9 value regressions of the three circles (center coordinates and radii) are shown against the iterations. The training loss is shown in blue and the validation loss is shown in orange.
