# Supplementary material
Source: PubMed Central journal article supplement (PMC7606368)
Supplement: NIHMS1587910-supplement-4.pdf [file NIHMS1587910-supplement-4.pdf]

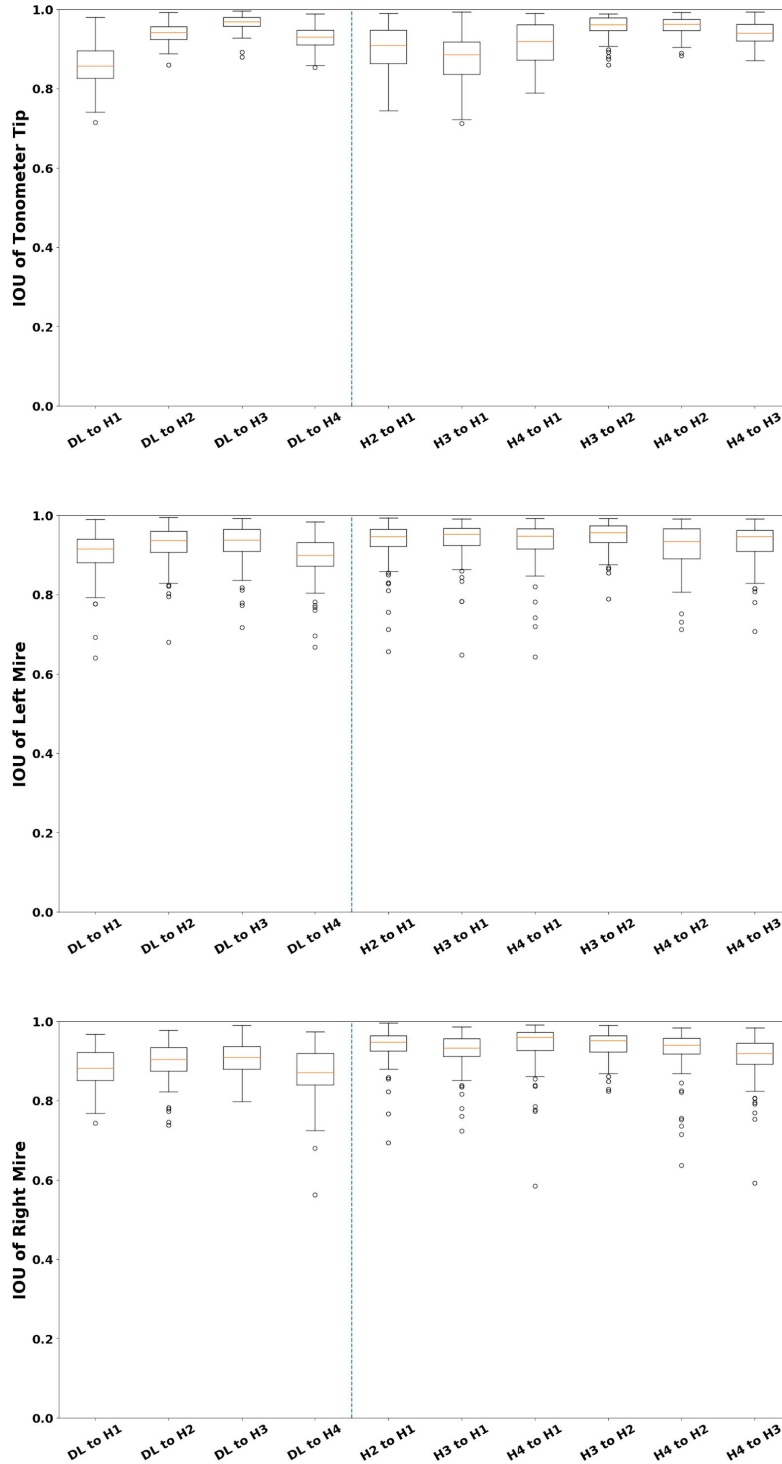

**Supplemental Figure 4. Test set deep learning segmentations relative to inter-human variabilities.** Intersection over unions (IoU) are shown for the tonometer tip circle (top), left inner mire (mid), and right inner mire (bot). Four masked humans performed independent segmentations and each human was set as rotating ground truths to assess deep learning to expert segmentation and for every human to each other.
