# Supplementary material
Source: PubMed Central journal article supplement (PMC7606368)
Supplement: NIHMS1587910-supplement-5.pdf [file NIHMS1587910-supplement-5.pdf]

**Supplemental Table: Network hyperparameters**

| <b>Parameter</b>                          | <b>Setting/value</b> |
|-------------------------------------------|----------------------|
| Batch Size (Training)                     | 4                    |
| Batch Size (Validation)                   | 2                    |
| Optimizer                                 | Adam                 |
| Initial Learning Rate                     | 0.001                |
| Exponential Learning Rate Decay per Epoch | 0.99                 |
| Number of epochs trained                  | 100                  |
| Number of trainable parameters            | 59,299,153           |
| Space complexity (MB)                     | 678                  |
| GPU Specification                         | GeForce GTX 1080 Ti  |
| Training time (hours)                     | 30                   |
